# Supplementary material for: Early access programs for medicines: comparative analysis among France, Italy, Spain, and UK and focus on the Italian case
Source: PubMed Central journal article supplement (PMC10193685; doi:10.1186/s40545-023-00570-z), 2023-05-17

# APPENDIX 1

## EAP process in France, Italy, Spain, and UK

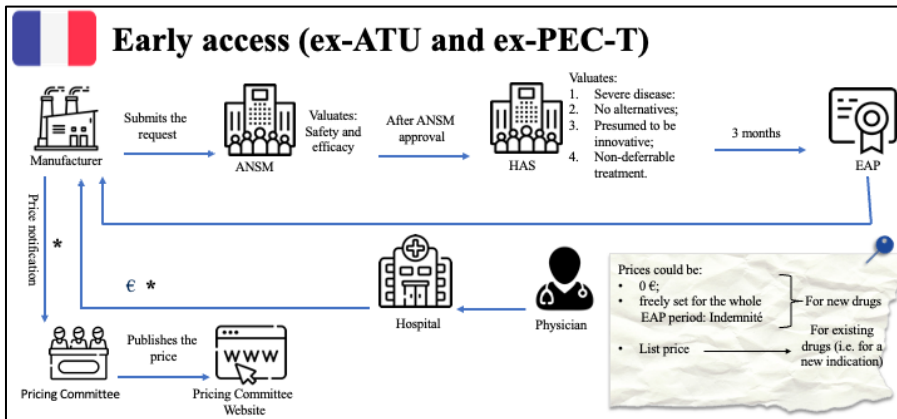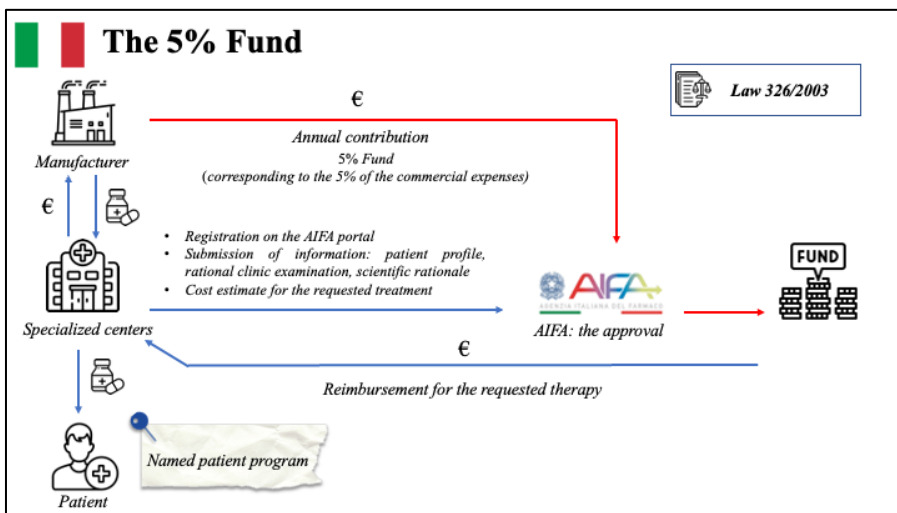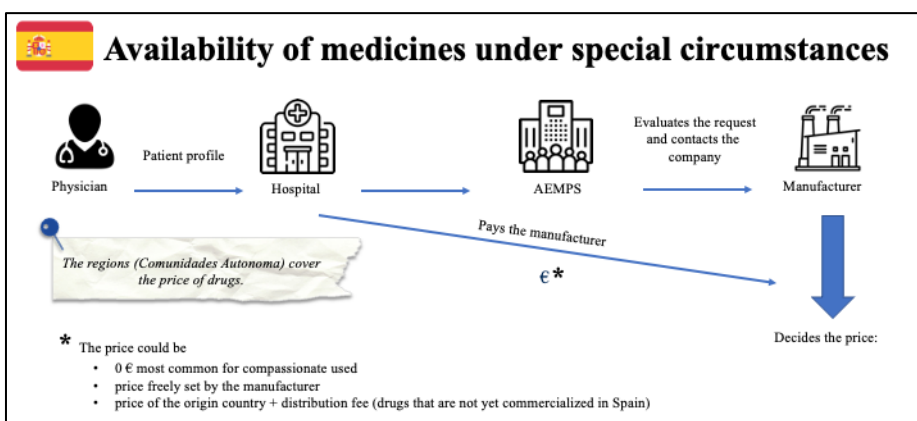

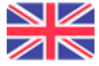

## EAMS (Early Access to Medicine Schemes)

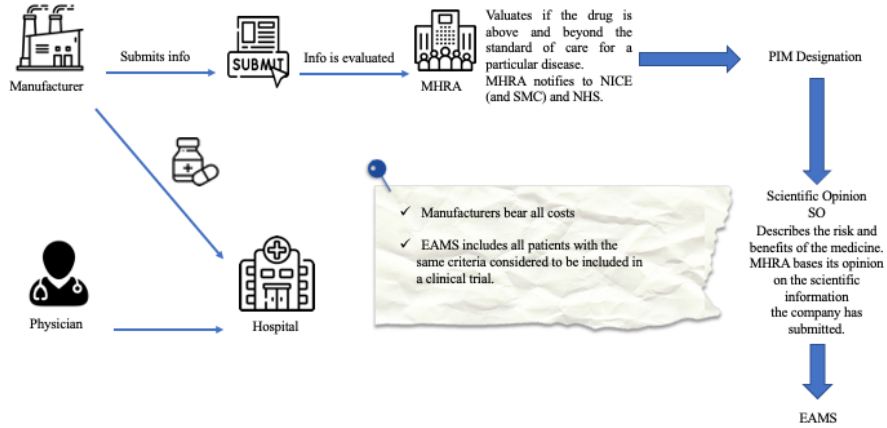

Supplement: 40545_2023_570_MOESM1_ESM.pdf [file 40545_2023_570_MOESM1_ESM.pdf]
