# Supplementary material for: Early access programs for medicines: comparative analysis among France, Italy, Spain, and UK and focus on the Italian case
Source: PubMed Central journal article supplement (PMC10193685; doi:10.1186/s40545-023-00570-z), 2023-05-17
Supplement: 40545_2023_570_MOESM2_ESM.pdf [file 40545_2023_570_MOESM2_ESM.pdf]

## APPENDIX 2

### EAP in Italy, including Compassionate use

| EAP                            |                            | Compassionate use                                                                                                                   | 648 List                                                                                                         | 5% Fund                                                                                                                             |
|--------------------------------|----------------------------|-------------------------------------------------------------------------------------------------------------------------------------|------------------------------------------------------------------------------------------------------------------|-------------------------------------------------------------------------------------------------------------------------------------|
| <b>General Label</b>           |                            | Accesso precoce e uso off label                                                                                                     |                                                                                                                  |                                                                                                                                     |
| <b>Regulatory Reference</b>    |                            | DM 8/5/2013 - DM 7/9/2017                                                                                                           | Legge 648/96, Legge 79/2014, Decreto 2/8/2019                                                                    | Legge 326/03                                                                                                                        |
| <b>Named / Cohort</b>          |                            | Named / Cohort (expanded access)                                                                                                    | Cohort                                                                                                           | Named                                                                                                                               |
| <b>Coverage</b>                |                            | Before MA / Till the medicine is 'available'                                                                                        | Before MA (but expanded for new drug till the completion of P&R process)                                         | Before MA (after MA for orphan drugs)                                                                                               |
| <b>Process</b>                 | <b>Applicant</b>           | Clinicians                                                                                                                          | Patient Associations, Scientific Societies, Health Care Organisations, IRCCS, University, Clinicians, AIFA (CTS) | Reference / Specialised Centres (online form till July 2022)                                                                        |
|                                | <b>Approval</b>            | Ethics Committee (Notification to Aifa for cohort-based)                                                                            | Aifa (CTS): simplified price negotiation (Decreto 2/8/2019)                                                      | Aifa (CTS)                                                                                                                          |
|                                | <b>Payers of medicines</b> | Industry                                                                                                                            | Regions                                                                                                          | AIFA through 5% Fund fed by the industry                                                                                            |
| <b>Selection criteria</b>      | <b>Target diseases</b>     | Severe diseases or rare life-threatening diseases                                                                                   | -                                                                                                                | Rare diseases / Particular and severe diseases                                                                                      |
|                                | <b>Medicines</b>           | No valid alternatives<br>Medicines / Indication under clinical development<br>Medicines / Indications with MA but not available yet | No valid alternatives<br>Cheaper than valid alternatives                                                         | Orphan drugs / Drugs in development not approved yet "which represent a hope of therapy"                                            |
|                                | <b>Evidence</b>            | Phase II (Phase I per rare diseases and rare tumours)                                                                               | Phase II / Data that may support to their use (pure 'off label')                                                 | Clinical report                                                                                                                     |
| <b>Data collection</b>         |                            | Adverse reactions (to notify to AIFA)                                                                                               | In principle data on efficacy and safety profile (from the Regions to AIFA) (data are not available)             | No                                                                                                                                  |
| <b>Data on economic impact</b> |                            | -*                                                                                                                                  | In principle data on efficacy and safety profile (from the Regions to AIFA) (data are not available)             | Till 2017 dedicated fund and consolidated data on applications. 2020 only dedicated fund. From 2020 data on each single application |
| <b>Dedicated budget</b>        |                            | -                                                                                                                                   | No                                                                                                               | Yes (funded by the industry)                                                                                                        |
| <b>MEA</b>                     |                            | No                                                                                                                                  | Rarely applied                                                                                                   | No                                                                                                                                  |
| <b>Impact on P&amp;R</b>       |                            | ?                                                                                                                                   | Yes (medicines in 648 as comparators / revenue from 648 considered in P&R negotiation)                           | ?                                                                                                                                   |
